# Supplementary material for: Genetic diversity analysis of the natural regeneration loci of Liriodendron chinense in artificial mixed forests in the rocky desertification area of Western Hunan
Source: PeerJ. 2025 Oct 23;13:e20138. doi: 10.7717/peerj.20138 (PMC12554308; doi:10.7717/peerj.20138)
Supplement: Supplemental Information 1 [file peerj-13-20138-s001.xlsx]

## Sheet: 合并
Sample	Latitude (N)	Longitude (E)
3	29.05	110.227
14	29.0501	110.227
15	29.0501	110.227
16	29.0501	110.227
20	29.0501	110.227
23	29.0502	110.227
24	29.0502	110.227
25	29.0501	110.227
27	29.0502	110.227
29	29.0502	110.227
32	29.0502	110.227
33	29.0502	110.227
34	29.0502	110.227
35	29.0502	110.227
36	29.0502	110.227
38	29.0502	110.227
39	29.0502	110.227
43	29.0501	110.227
44	29.0501	110.227
45	29.0501	110.227
46	29.0502	110.227
47	29.0502	110.227
47	29.0502	110.227
48	29.0502	110.227
49	29.0502	110.227
51	29.0501	110.227
53	29.0501	110.227
56	29.0501	110.227
57	29.0501	110.227
58	29.0501	110.227
59	29.0501	110.227
60	29.0501	110.227
61	29.0501	110.227
62	29.0501	110.227
65	29.0501	110.227
66	29.0501	110.227
67	29.05	110.227
69	29.0501	110.227
71	29.0501	110.227
72	29.0501	110.227
74	29.0501	110.227
75	29.0501	110.227
77	29.0501	110.227
78	29.0501	110.227
79	29.0502	110.227
81	29.0502	110.227
82	29.0502	110.227
83	29.0502	110.227
85	29.0501	110.227
86	29.0502	110.227
87	29.0502	110.227
91	29.0502	110.227
92	29.0502	110.227
93	29.0501	110.227
94	29.0502	110.227
96	29.0502	110.227
98	29.0502	110.227
101	29.0502	110.227
102	29.0502	110.227
103	29.0502	110.227
104	29.0502	110.227
106	29.05	110.227
107	29.05	110.227
108	29.0501	110.227
109	29.0501	110.227
110	29.0501	110.227
111	29.0501	110.227
117	29.0501	110.227
119	29.0502	110.227
120	29.0502	110.227
123	29.0501	110.227
126	29.0502	110.227
130	29.0501	110.227
138	29.0501	110.227
139	29.0501	110.227
143	29.0501	110.227
144	29.0501	110.227
157	29.0501	110.227
188	29.0502	110.226
247	29.0503	110.226
247	29.0503	110.226
256	29.0503	110.227
259	29.0503	110.227
279	29.0503	110.227
282	29.0502	110.227
284	29.0502	110.227
285	29.0503	110.227
287	29.0503	110.227
291	29.0504	110.227
294	29.0504	110.227
295	29.0504	110.227
297	29.0503	110.227
298	29.0504	110.227
301	29.0504	110.227
303	29.0503	110.227
305	29.0502	110.227
306	29.0502	110.227
308	29.0503	110.227
309	29.0503	110.227
310	29.0503	110.227
311	29.0502	110.227
312	29.0503	110.227
316	29.0503	110.227
318	29.0503	110.227
319	29.0503	110.227
320	29.0504	110.227
321	29.0504	110.227
322	29.0504	110.227
325	29.0503	110.227
326	29.0504	110.227
327	29.0503	110.227
328	29.0503	110.227
330	29.0503	110.227
331	29.0502	110.227
333	29.0502	110.227
336	29.0504	110.227
337	29.0505	110.227
338	29.0505	110.227
339	29.0506	110.227
340	29.0505	110.227
341	29.0506	110.227
344	29.0505	110.227
345	29.0505	110.227
346	29.0506	110.227
347	29.0505	110.227
348	29.0505	110.227
349	29.0504	110.227
350	29.0504	110.227
351	29.0504	110.227
352	29.0504	110.227
353	29.0505	110.227
354	29.0504	110.227
363	29.0506	110.227
505	29.0507	110.226
569	29.0506	110.227
599	29.0507	110.227
600	29.0507	110.227
601	29.0507	110.227
604	29.0507	110.227
605	29.0508	110.227
607	29.0507	110.227
608	29.0506	110.227
609	29.0507	110.227
610	29.0506	110.227
612	29.0507	110.227
613	29.0506	110.227
615	29.0506	110.227
616	29.0506	110.227
617	29.0506	110.227
618	29.0506	110.227
619	29.0506	110.227
631	29.0509	110.227
645	29.0508	110.227
677	29.0509	110.227
843	29.0504	110.227
868	29.0501	110.227
870	29.0501	110.227
871	29.0502	110.227
872	29.0501	110.227
875	29.05	110.227
877	29.05	110.227
878	29.05	110.227
878	29.05	110.227
880	29.05	110.227
880	29.0501	110.227
901	29.05	110.227
902	29.05	110.227
903	29.05	110.227
904	29.05	110.227
905	29.05	110.227
906	29.05	110.227
907	29.05	110.227
908	29.05	110.227
909	29.05	110.227
910	29.05	110.227
916	29.05	110.227
917	29.05	110.227
918	29.05	110.227
919	29.05	110.227
922	29.05	110.227
925	29.05	110.227
944	29.05	110.227
952	29.05	110.227
957	29.05	110.226
1052	29.0505	110.227
1078	29.0504	110.228
1085	29.0503	110.227
1087	29.0503	110.227
1088	29.0503	110.227
1089	29.0503	110.227
1090	29.0503	110.228
1099	29.0501	110.227
1100	29.0501	110.227
1101	29.0501	110.227
1103	29.0501	110.228
1106	29.0501	110.227
1133	29.051	110.226
1162	29.05	110.227
1163	29.05	110.227
1164	29.0501	110.227
1165	29.0502	110.227
1166	29.0502	110.227
1167	29.0502	110.227
1168	29.0504	110.227
1169	29.0504	110.227
1243	29.0499	110.227
1248	29.05	110.227
1249	29.05	110.227
1254	29.0499	110.227
1255	29.0499	110.227
1258	29.0499	110.227
1263	29.05	110.227
1265	29.05	110.227
1266	29.0499	110.227
1267	29.0498	110.227
1268	29.0498	110.227
1269	29.0499	110.227
1270	29.0499	110.227
1271	29.0499	110.227
1272	29.0498	110.227
1273	29.0498	110.227
1276	29.0498	110.227
1277	29.0499	110.227
3100	29.05	110.227
3101	29.05	110.227
3102	29.05	110.227
3103	29.05	110.227
3104	29.05	110.227
3116	29.0499	110.228
3117	29.0499	110.228
3119	29.0499	110.228
3123	29.0504	110.228
3125	29.0507	110.227
3126	29.0508	110.227
3128	29.0508	110.227
3129	29.0503	110.227
3130	29.0502	110.227
3140	29.0501	110.227
3168	29.0503	110.228
3172	29.0497	110.228
3200	29.0499	110.227
3201	29.05	110.227
3202	29.0499	110.227
3203	29.0499	110.227
3204	29.0499	110.227
3205	29.0499	110.227
3206	29.0499	110.227
3207	29.0499	110.227
3208	29.0499	110.227
3209	29.0499	110.227
3211	29.0499	110.227
3212	29.0499	110.227
3213	29.0499	110.227
3214	29.0498	110.227
3215	29.0498	110.227
3216	29.0498	110.227
3217	29.0498	110.227
3218	29.0498	110.227
3219	29.0498	110.227
3220	29.0498	110.227
3221	29.0497	110.227
3222	29.0497	110.227
3224	29.0497	110.227
3225	29.0497	110.227
3227	29.0498	110.227
3228	29.0498	110.227
3229	29.0498	110.227
3231	29.0498	110.227
3232	29.0497	110.227
3234	29.0497	110.227
3235	29.0498	110.227
3236	29.0498	110.227
3237	29.0498	110.227
3238	29.0501	110.227
3239	29.05	110.227
3240	29.05	110.227
3241	29.05	110.227
3242	29.05	110.227
3243	29.05	110.227
3244	29.05	110.228
3245	29.05	110.228
3246	29.05	110.228
3247	29.0499	110.227
3248	29.0501	110.228
3249	29.0502	110.228
3250	29.0501	110.227
3251	29.0502	110.227
3252	29.0503	110.227
3253	29.0504	110.228
3255	29.0504	110.228
3256	29.0503	110.228
3257	29.0503	110.228
3258	29.0503	110.228
3259	29.0503	110.228
3260	29.0503	110.228
3261	29.0503	110.228
3262	29.0502	110.228
3263	29.0502	110.228
3264	29.0503	110.228
3265	29.0502	110.228
3266	29.0502	110.228
3267	29.0505	110.228
3268	29.0505	110.228
3269	29.0505	110.228
3270	29.0506	110.228
3271	29.0505	110.228
3272	29.0509	110.227
